# Supplementary material for: Construction of Metabolic Molecular Classification and Immune Characteristics for the Prognosis Prediction of Ovarian Cancer
Source: Hindawi journal article supplement (doi:10.1155/2022/2359349), 2022-06-25

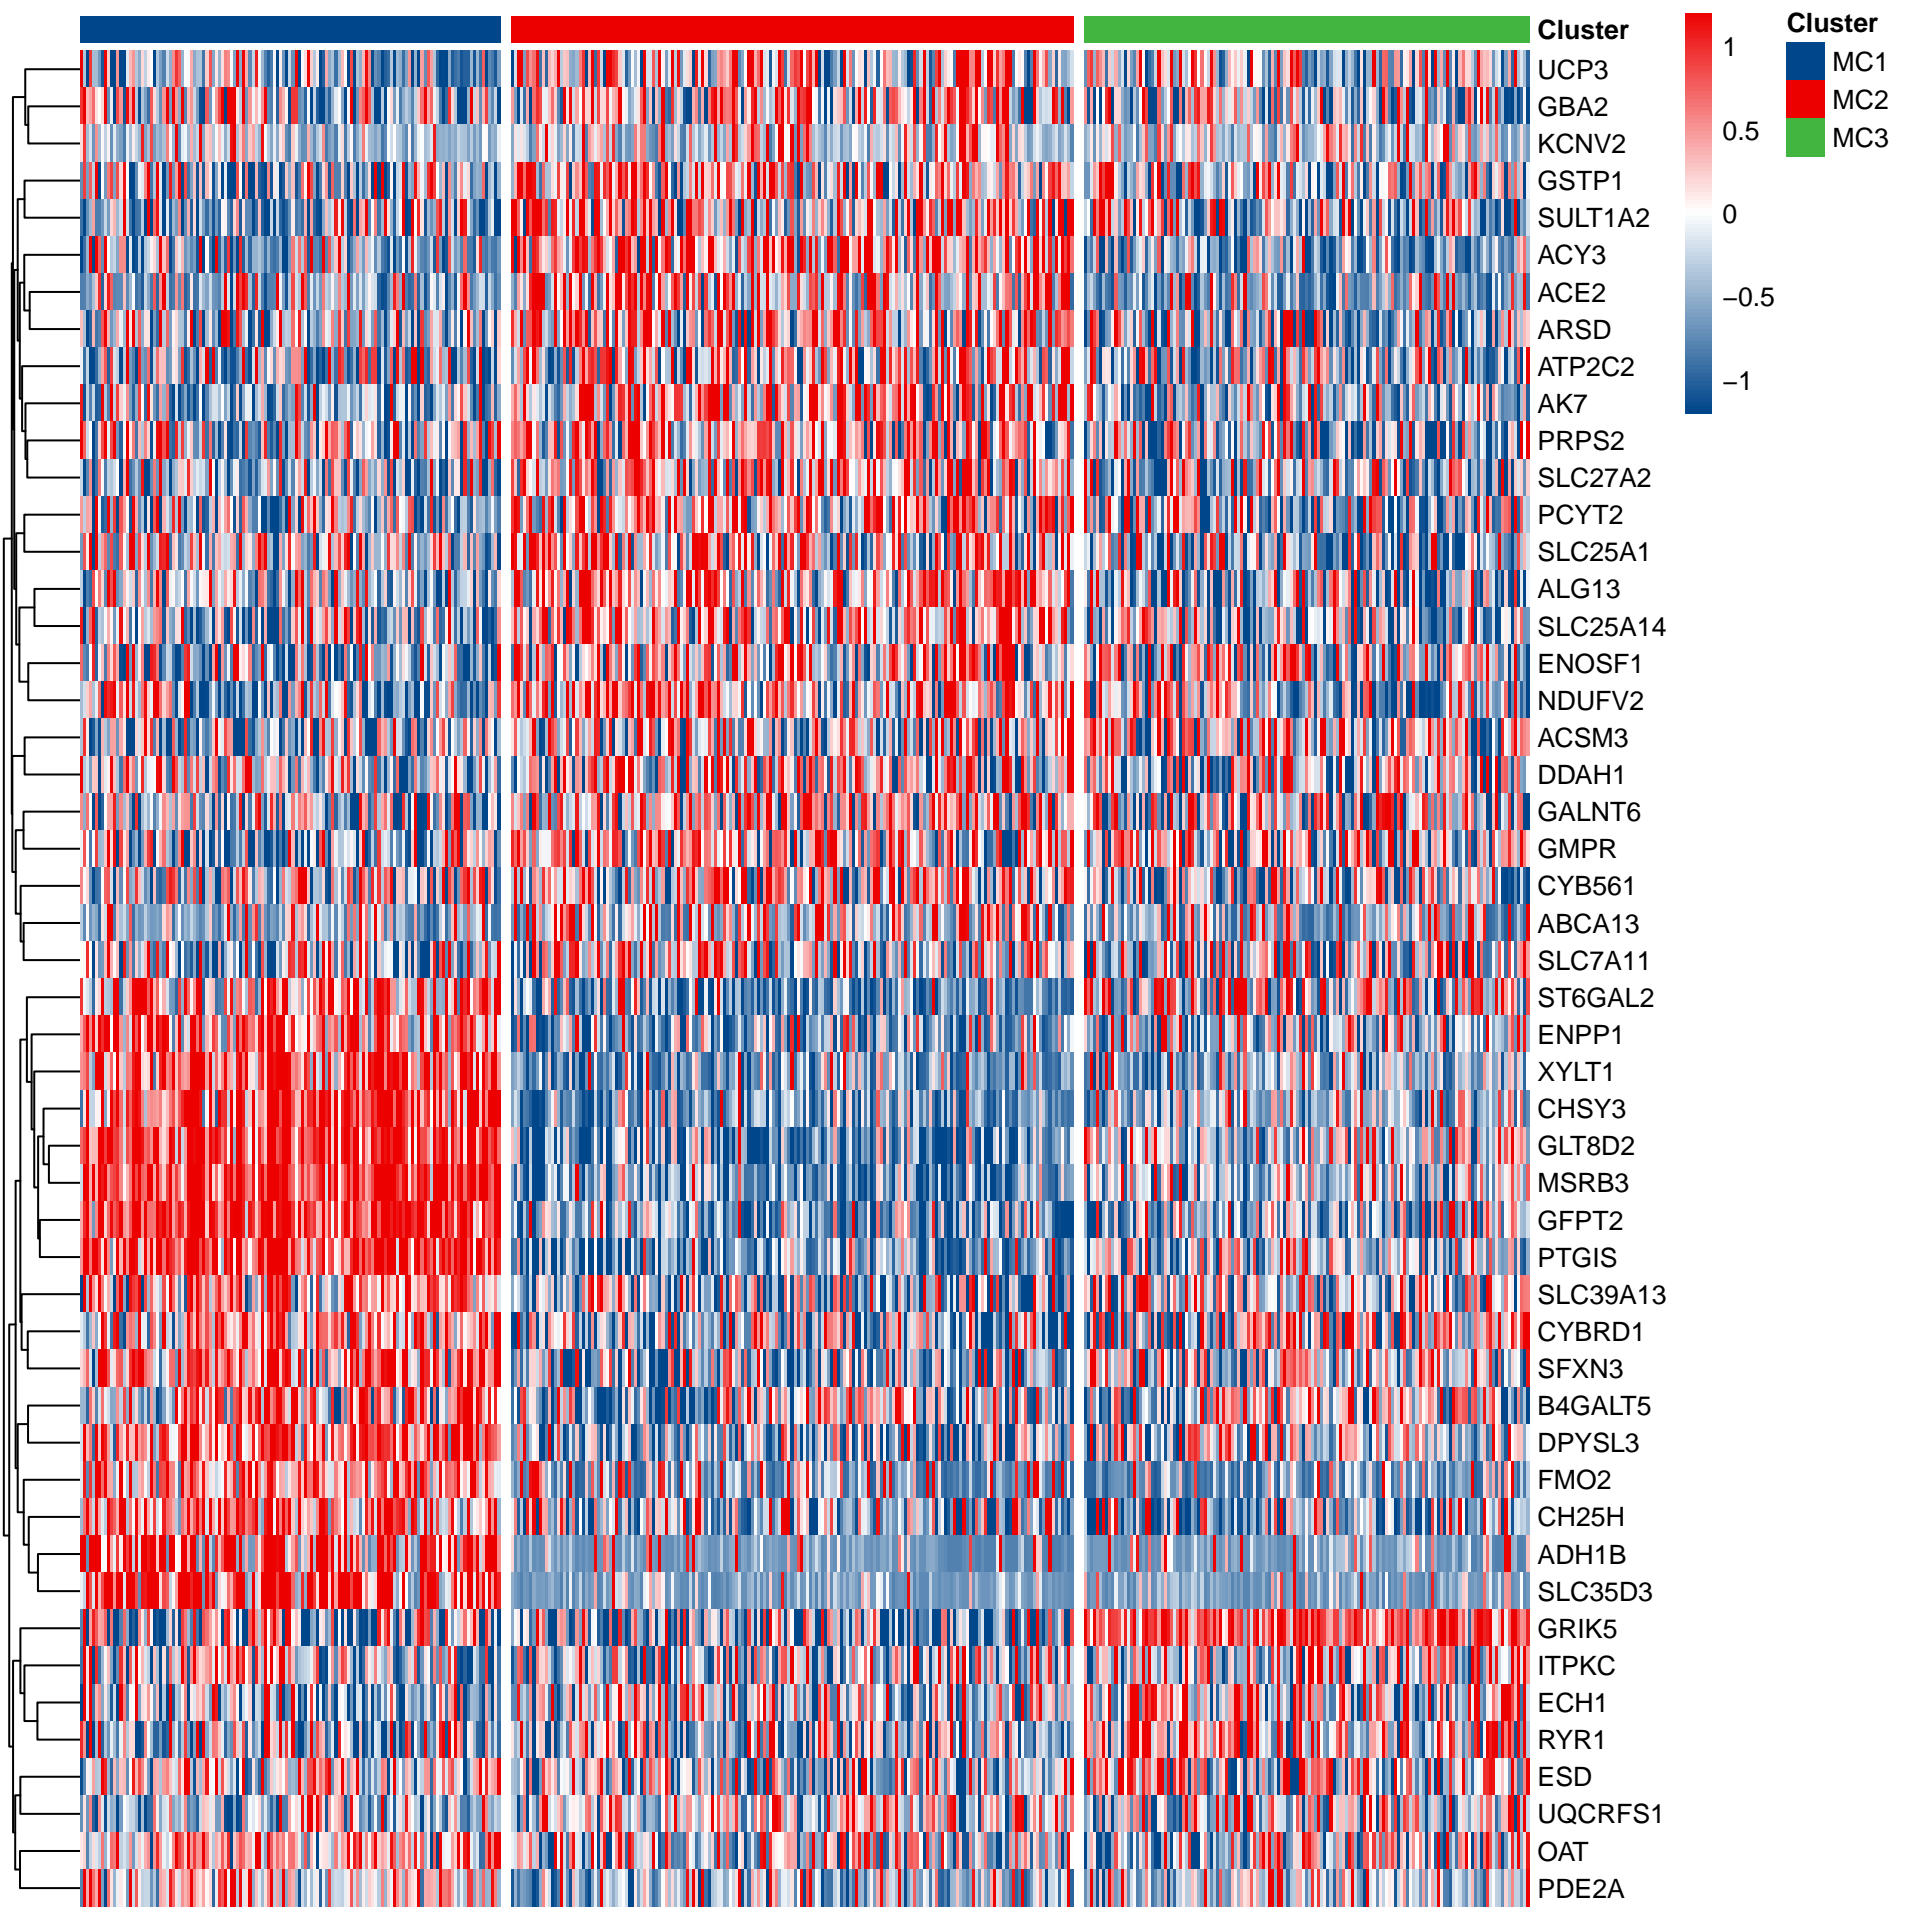

Supplement: f2 [file 2359349.f2.pdf]
