# Supplementary material for: Construction of Metabolic Molecular Classification and Immune Characteristics for the Prognosis Prediction of Ovarian Cancer
Source: Hindawi journal article supplement (doi:10.1155/2022/2359349), 2022-06-25
Supplement: f7 [file 2359349.f7.pdf]

Supplementary Table S1. A list of 50  
metabolic genes associated with  
prognosis.

genes  
1 ABCA13  
2 ACE2  
3 ACSM3  
4 ACY3  
5 AK7  
6 ALG13  
7 ARSD  
8 ATP2C2  
9 CYB561  
10 DDAH1  
11 ENOSF1  
12 GALNT6  
13 GBA2  
14 GMPR  
15 GSTP1  
16 KCNV2  
17 NDUFV2  
18 PCYT2  
19 PRPS2  
20 SLC25A1  
21 SLC25A14  
22 SLC27A2  
23 SLC7A11  
24 SULT1A2  
25 UCP3  
26 ADH1B  
27 B4GALT5  
28 CH25H  
29 CHSY3  
30 CYBRD1  
31 DPYSL3  
32 ECH1  
33 ENPP1  
34 ESD  
35 FMO2  
36 GFPT2  
37 GLT8D2  
38 GRIK5  
39 ITPKC  
40 MSRB3  
41 OAT  
42 PDE2A  
43 PTGIS  
44 RYR1  
45 SFXN3  
46 SLC35D3  
47 SLC39A13  
48 ST6GAL2  
49 UQCRFS1
